# Supplementary material for: Anti-Obesity Effect of Auricularia delicate Involves Intestinal-Microbiota-Mediated Oxidative Stress Regulation in High-Fat-Diet-Fed Mice
Source: MDPI journal article supplement (doi:10.3390/nu15040872), 2023-02-08
Supplement: s1 [file s1]

## Supplementary material

**Supplementary Table S1** The effects of ADe on body weight and organ index.

|                    | Week   | NCD         | NCD+400 mg/kg<br>ADe       | HFD                        | HFD+400 mg/kg ADe         | HFD+800 mg/kg ADe          | HFD+3 mg/kg Sim          |
|--------------------|--------|-------------|----------------------------|----------------------------|---------------------------|----------------------------|--------------------------|
| Body<br>weight (g) | 0      | 23.5±0.3    | 24.5±0.6 <sup>#</sup>      | 33.4±1 <sup>###</sup>      | 32.3±0.9                  | 34.7±1                     | 34.9±1.6                 |
|                    | 1      | 25.1±0.5    | 23.6±0.4 <sup>#</sup>      | 34±0.9 <sup>###</sup>      | 32.5±1.3                  | 32.2±1.3                   | 34.5±1                   |
|                    | 2      | 26.4±0.4    | 24.5±0.5 <sup>#</sup>      | 36.3±1.8 <sup>###</sup>    | 33.5±1.6                  | 32.9±1.2                   | 33.4±1.4                 |
|                    | 3      | 26.1±0.4    | 24.7±0.5 <sup>#</sup>      | 34.7±0.9 <sup>###</sup>    | 35.6±1.4                  | 34.4±1                     | 34.7±1.7                 |
|                    | 4      | 25.8±0.4    | 24.5±0.3 <sup>#</sup>      | 39.5±1.1 <sup>###</sup>    | 34±1 <sup>**</sup>        | 36.1±0.8 <sup>*</sup>      | 37.5±1.3                 |
|                    | 5      | 26±0.4      | 24.7±0.3 <sup>#</sup>      | 43.9±1.3 <sup>###</sup>    | 36.5±1.2 <sup>**</sup>    | 37.7±0.8 <sup>**</sup>     | 37.8±1.3 <sup>**</sup>   |
|                    | 6      | 26.3±0.5    | 24.6±0.5 <sup>#</sup>      | 45.9±1.4 <sup>###</sup>    | 39.4±1.5 <sup>**</sup>    | 38.5±1 <sup>**</sup>       | 39.5±1.6 <sup>*</sup>    |
|                    | 7      | 27±0.2      | 25.8±0.4 <sup>#</sup>      | 46.4±1.2 <sup>###</sup>    | 40.7±1.5 <sup>*</sup>     | 41.8±1.5 <sup>*</sup>      | 41.6±1.2 <sup>*</sup>    |
|                    | 8      | 27.2±0.6    | 24.7±0.5 <sup>#</sup>      | 48.2±1.1 <sup>###</sup>    | 42.9±0.9 <sup>**</sup>    | 42.9±1.1 <sup>**</sup>     | 41.8±2.4 <sup>*</sup>    |
|                    | 9      | 27.2±0.3    | 25.4±0.5 <sup>#</sup>      | 47.9±1.1 <sup>###</sup>    | 42.8±1.6 <sup>*</sup>     | 44.1±1.2 <sup>*</sup>      | 41.4±2 <sup>*</sup>      |
|                    | 10     | 27.5±0.5    | 25.2±0.6 <sup>#</sup>      | 50.6±1.2 <sup>###</sup>    | 44.8±2.2 <sup>*</sup>     | 45.8±1.5 <sup>*</sup>      | 45.4±1.9 <sup>*</sup>    |
| Organ index<br>(%) | Spleen | 0.239±0.01  | 0.239±0.01                 | 0.174±0.006 <sup>###</sup> | 0.19±0.001 <sup>*</sup>   | 0.195±0.006 <sup>*</sup>   | 0.179±0.005              |
|                    | Kidney | 1.19±0.017  | 1.255±0.009 <sup>###</sup> | 0.689±0.022 <sup>###</sup> | 0.852±0.037 <sup>**</sup> | 0.834±0.021 <sup>***</sup> | 0.825±0.042 <sup>*</sup> |
|                    | Heart  | 0.543±0.018 | 0.51±0.022                 | 0.384±0.011 <sup>###</sup> | 0.443±0.02 <sup>*</sup>   | 0.46±0.019 <sup>**</sup>   | 0.43±0.015 <sup>*</sup>  |

Data were analyzed using a one-way ANOVA and are expressed as the means ± S.E.M. (n = 6). <sup>#</sup>  $p < 0.05$ , <sup>##</sup>  $p < 0.01$  and <sup>###</sup>  $p < 0.001$  versus NCD-fed mice; <sup>\*</sup>  $p < 0.05$ , <sup>\*\*</sup>  $p < 0.01$  and <sup>\*\*\*</sup>  $p < 0.001$  versus HFD- fed mice.

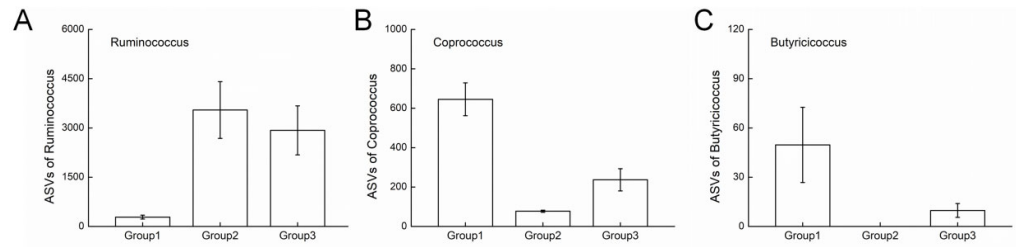

**Figure S1** The ASVs number of *Ruminococcus* (A), *Coprococcus* (B), and *Butyrificoccus* (C). Data are presented as the mean  $\pm$  S.E.M. ( $n = 3$  for NCD-fed mice and HFD-fed mice, and  $n=4$  for ADe-treated HFD-fed mice). Group 1: NCD-fed mice, Group 2: HFD-fed mice, Group 3: ADe-treated HFD-fed mice.
